# Supplementary material for: Evolutionary loss of peroxisomes – not limited to parasites
Source: PubMed Central journal article supplement (PMC4690255; doi:10.1186/s13062-015-0101-6), 2015-12-23

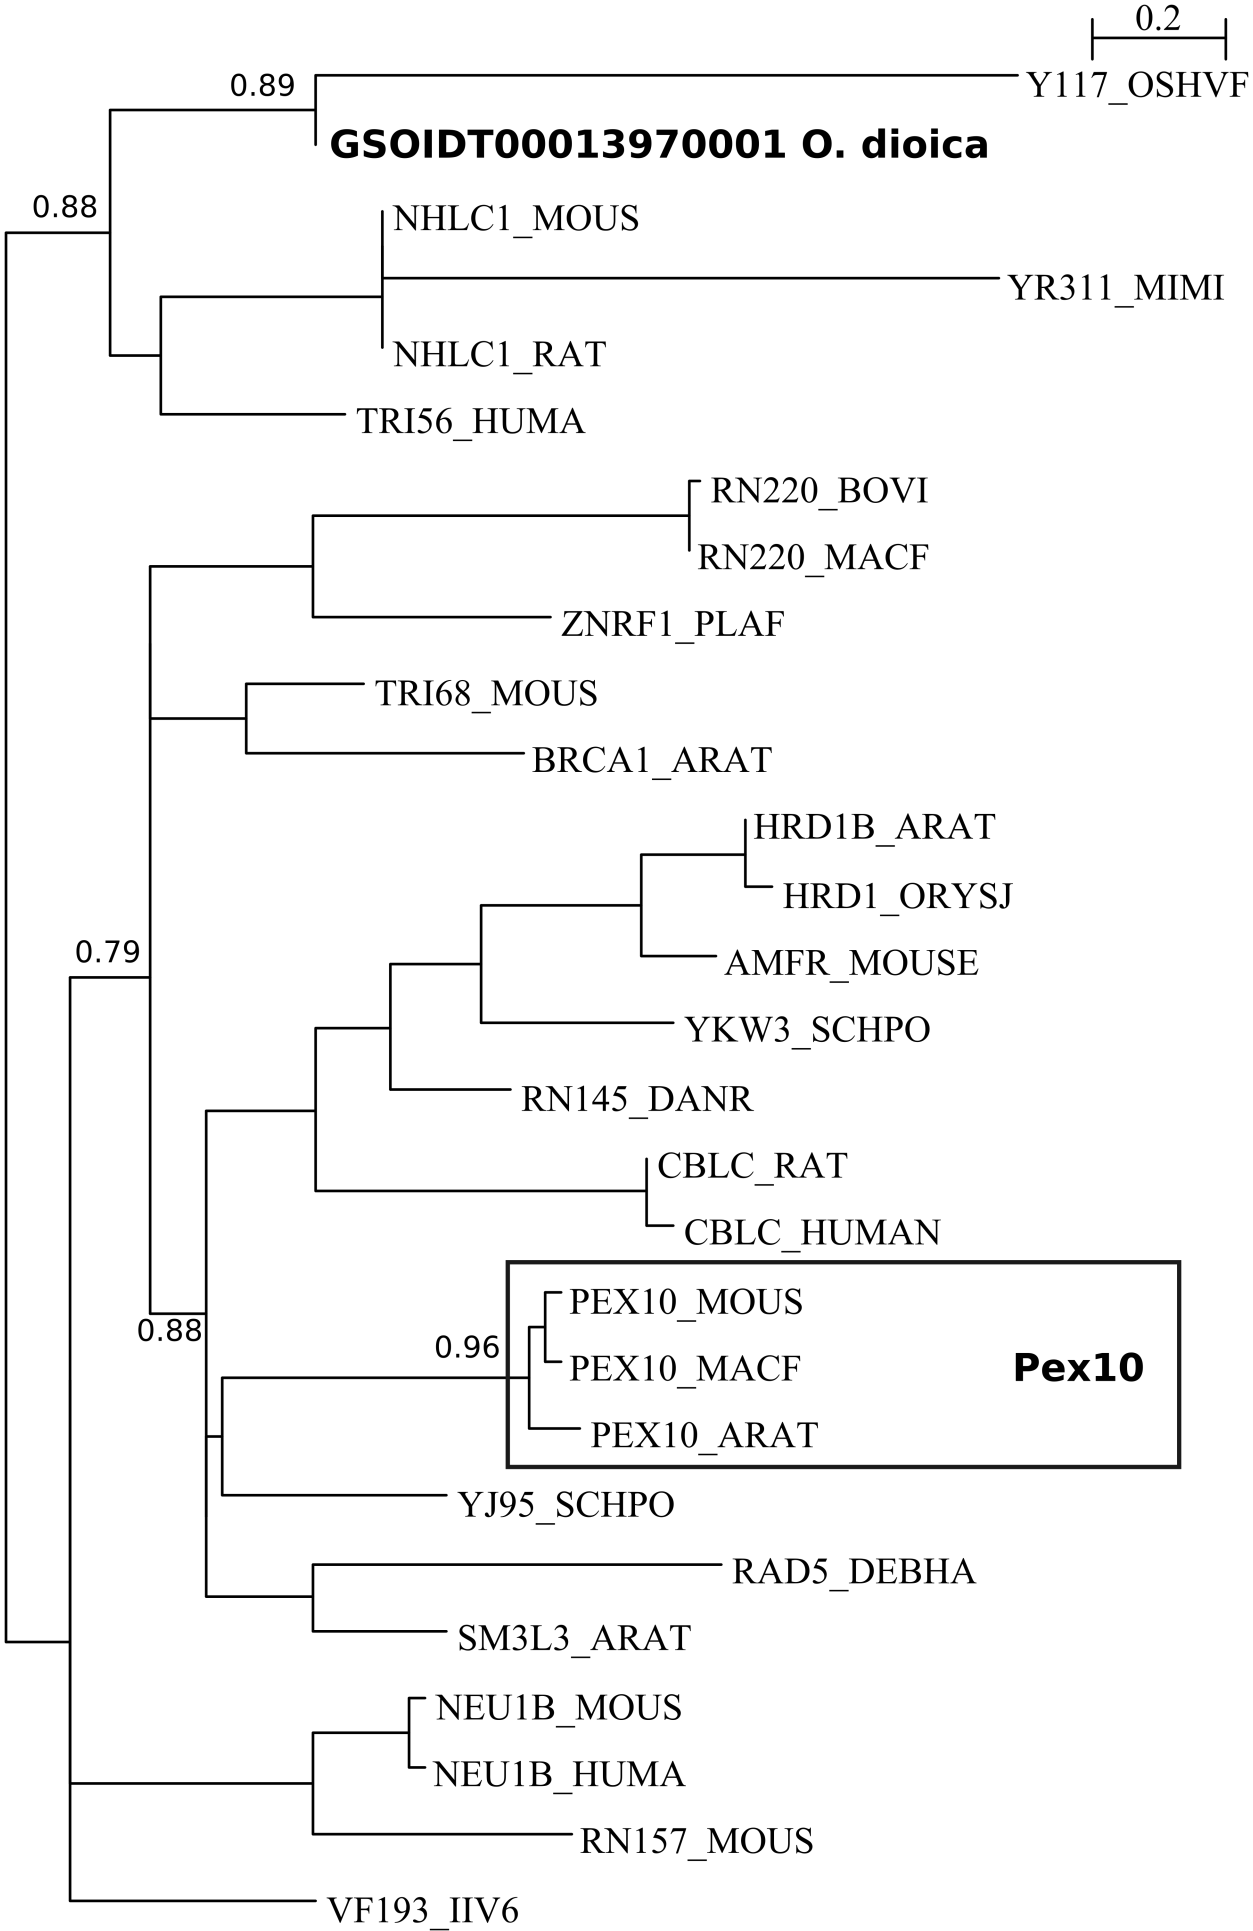

Supplement: 13062_2015_101_MOESM3_ESM.pdf [file 13062_2015_101_MOESM3_ESM.pdf]
